1    **Physiological reason for ceasing growth of unfertilized eggs**  
2    **produced by unmated queens in the subterranean termite**  
3    ***Reticulitermes chinensis***

4

5    Ganghua Li<sup>1,2</sup>, Long Liu<sup>1</sup>, Pengdong Sun<sup>1</sup>, Yao Wu<sup>1</sup>, Chaoliang Lei<sup>1</sup>,  
6    Xiongwen Chen<sup>2</sup> and Qiuying Huang<sup>1,\*</sup>

7

8    <sup>1</sup>College of Plant Science and Technology, Huazhong Agricultural University, Wuhan  
9    430070, Hubei, China

10    <sup>2</sup>College of Life Science, Hubei Normal University, Huangshi 435002, Hubei, China

11    \* Author for correspondence (qyhuang2006@mail.hzau.edu.cn)

12

13    **Keywords:** termites, asexual queen succession, ovarian development, embryonic  
14    growth, physiological indices

## 15 ABSTRACT

16 In *Reticulitermes chinensis*, a close relative of *R. speratus* with asexual queen  
 17 succession, unfertilized eggs can be produced but are not incubated. To explain this  
 18 phenomenon, we analysed the physiological differences between unfertilized  
 19 eggs/unmated queens and fertilized eggs/mated queens. Fertilized eggs consumed  
 20 significantly larger quantities of five amino acids (Cys, Met, Ile, Leu and Tyr), Ca,  
 21 protein and cholesterol during incubation. The higher levels of four trace elements  
 22 (Na, K, Zn and Fe) in fertilized eggs and their lower levels in mated queens indicated  
 23 that mated queens might transfer these trace elements to fertilized eggs to complete  
 24 incubation. The higher levels of Mn, triglycerides and serotonin in mated queens and  
 25 higher levels of Mn and glucose in fertilized eggs suggested that these substances are  
 26 very important for normal ovarian and embryonic growth. The different expression of  
 27 three reproductive genes (*vtg1*, *rab11* and *JHE1*) suggested that they might be  
 28 involved in the regulation of ovarian and embryonic growth. Overall, changes in these  
 29 physiological indices may substantially affect ovarian and embryonic growth and  
 30 prohibit the incubation of unfertilized eggs in *R. chinensis*.

## INTRODUCTION

Recently, asexual queen succession (AQS) has been described in three species of lower termites [*Reticulitermes speratus* (Matsuura et al., 2009), *R. virginicus* (Vargo et al., 2012) and *R. lucifugus* (Luchetti et al., 2013)] and two species of higher termites [*Embiratermes neotenicus* (Fougeyrollas et al., 2015) and *Cavitermes tuberosus* (Roisin et al., 2014)]. In AQS species of termites, workers, soldiers and alates are sexually produced but neotenic queens arise through thelytokous parthenogenesis (Matsuura et al., 2009). This AQS system enables the primary queen to maintain her full genetic contribution to the next generation while avoiding any loss of genetic diversity from inbreeding (Matsuura, 2011). Most of the work conducted on the AQS system in termites has focused on the discovery of new AQS species and the mechanism of facultative parthenogenesis (Fougeyrollas et al., 2015; Kawatsu and Matsuura, 2013; Luchetti et al., 2013; Roisin et al., 2014; Vargo et al., 2012; Yashiro and Matsuura, 2014). Some termite species that are evolutionally related to AQS species of termites have been demonstrated to exhibit neither AQS nor parthenogenesis (Kawatsu and Matsuura, 2013; Luchetti et al., 2013). However, little is known about why these termite species have no AQS and specifically why unfertilized eggs produced by unmated queens of these species are unable to hatch.

The ovarian and embryonic development of insects are both complex physiological processes that are influenced by many physiological factors, including nutrients (Bodnaryk and Morrison, 1966; Judd et al., 2010), trace elements (Chaudhury et al., 2000; Hammack, 1999), hormones (Hagedorn et al., 1975; Lagueux et al., 1977) and reproductive genes (e.g., vitellogenin genes) (Ishitani and Maekawa, 2010; Maekawa et al., 2010). For example, wasp eggs require substantial quantities of proteins and lipids to provide the materials and energy for embryonic growth (Judd et al., 2010). Adult female house flies require an adequate protein diet to initiate and sustain normal ovarian development (Bodnaryk and Morrison, 1966). In adult mosquitoes (Hagedorn et al., 1975) and adult females of *Locusta migratoria* (Lagueux et al., 1977), ecdysone plays an important role in stimulating egg development and vitellogenin synthesis. Metal ions participate in the process of enzyme activation and in trigger and control mechanisms (Chaudhury et al., 2000). For example, potassium (K) was reported to be a key ion for protein-dependent egg maturation in three insects, *Phormia regina*, *Sarcophaga bullata*, and *Cochliomyia hominivorax* (Chaudhury et al., 2000;

Hammack, 1999). Previous studies on ovarian development in termites have primarily focused on changes in ovarian morphology, JH titres and the expression of vitellogenin genes at different queen stages in *R. speratus* (Ishitani and Maekawa, 2010; Maekawa et al., 2010). With regard to embryonic growth in termites, differences in size, survival rate, and the length of the hatching period between unfertilized and fertilized eggs have been investigated in *R. speratus* (Matsuura and Kobayashi, 2007). However, the physiological differences between unfertilized eggs/unmated queens and fertilized eggs/mated queens, such as the content of amino acids, nutrients, trace elements, hormones, neurotransmitters and the expression of reproductive genes, have not been investigated in termites.

The subterranean termite *R. chinensis*, which is widely distributed in China, causes serious damage to buildings and forests and results in major economic losses (Liu et al., 2015). In the present study, we found that unfertilized eggs can be produced by unmated queens of *R. chinensis*, but they do not hatch under laboratory and simulated field conditions, suggesting that *R. chinensis* exhibits neither AQS nor parthenogenesis. To explore why unfertilized eggs of *R. chinensis* are unable to hatch, we conducted a comprehensive analysis of physiological differences in ovarian and embryonic growth between unfertilized eggs/unmated queens and fertilized eggs/mated queens. We found that unfertilized eggs ceased embryonic growth and had significant differences in morphological characters, size and micropyle (sperm gate) number compared with fertilized eggs in the final stage (stage V) of development. Moreover, there were significant differences in the levels of 11 amino acids, six trace elements, four nutrients, serotonin, and the expression of three reproductive genes (*vgt 1*, *rab 11* and *JHE1*) between unfertilized eggs/unmated queens and fertilized eggs/mated queens, suggesting that the absence of incubation of unfertilized eggs produced by unmated queens is associated with the above changes in physiological indices in *R. chinensis*. Our physiological findings contribute to an understanding of why the subterranean termite *R. chinensis* exhibits neither AQS nor parthenogenesis even though it is a close relative of *R. speratus*, which does exhibit AQS (Austin et al., 2004; Matsuura et al., 2009).

## RESULTS

### Formation of female-female colonies and female-male colonies under laboratory and simulated field conditions

97 The number of unfertilized eggs in FF colonies was significantly higher than the  
98 number of fertilized eggs in FM colonies at stages I and II (Fig. 1A; stage I:  $p = 0.001$ ;  
99 stage II:  $p < 0.001$ ). The numbers of both unfertilized and fertilized eggs decreased  
100 during stages III and IV, and no significant differences were found (Fig. 1A; stage III:  
101  $p = 0.643$ ; stage IV:  $p = 0.214$ ). At stage V, no newly produced eggs were found in  
102 either the FF or FM colonies.

103 No post-hatch individuals were observed in any FF colony at all five developmental  
104 stages (Fig. 1B). Post-hatch individuals (larvae, workers, pre-soldiers or soldiers)  
105 were found after stage II in the FM colonies (Fig. 1B). Larvae (1-5 individuals per  
106 colony) were found at stage II in all eight FM colonies (8/8 colonies: 100%). At stage  
107 III, all the eight FM colonies (100%) contained workers (2-8 individuals per colony).  
108 Two pre-soldiers were found in two of the FM colonies at stage IV (2/8 colonies:  
109 25%). Five soldiers were found in five colonies during stage V (5/8 colonies: 62.5%).  
110 The number of post-hatch individuals in the FM colonies was significantly higher  
111 than in FF colonies for stages II to V (Fig. 1B; stages II-V:  $p < 0.01$ ).

112 In simulated field conditions, no post-hatch individuals were found in any of the FF  
113 colonies 5.5 months after colony formation. However, post-hatch individuals (average  
114 6.29 individuals per colony) were found 5.5 months after colony formation in all the  
115 FM colonies (Fig. 1C). The number of post-hatch individuals in the FM colonies was  
116 significantly higher than in the FF colonies (Fig. 1C;  $p = 0.024$ ).

### 117 **Morphological observation of eggs at the five developmental stages**

118 The embryos of fertilized eggs developed normally and exhibited visible differences  
119 among the five developmental stages (from stage I to stage V, Fig. 2A). In unfertilized  
120 eggs, most of embryos ceased development at stage II, and only a few of the embryos  
121 developed to stage III or stage IV, but none of the embryos developed to stage V,  
122 unlike the fertilized eggs (Fig. 2A). There were no significant differences in  
123 morphological characters and size between unfertilized eggs and fertilized eggs prior  
124 to stage IV (Fig. 2A and B). However, the unfertilized eggs gradually shrank and  
125 spoiled, and they were significantly smaller than fertilized eggs at stage V (Fig. 2A  
126 and C;  $p = 0.008$ ). Micropyles were located on the posterior end of the eggs. Almost  
127 all the unfertilized eggs (14/15) had no micropyles, but all fertilized eggs had  
128 micropyles (Fig. 2D).

## 129 **Amino acids**

130 The levels of five amino acids (Cys, Met, Ile, Leu and Tyr) in unfertilized eggs from  
131 FF colonies were significantly higher than in fertilized eggs from FM colonies (Fig.  
132 3A and Table S1; Cys:  $t = -8.000$ ,  $df = 2$ ,  $p = 0.015$ ; Met:  $t = -6.424$ ,  $df = 2$ ,  $p = 0.023$ ;  
133 Ile:  $t = -10.250$ ,  $df = 2$ ,  $p = 0.009$ ; Leu:  $t = -5.277$ ,  $df = 2$ ,  $p = 0.034$ ; Tyr:  $t = -9.430$ ,  $df$   
134  $= 2$ ,  $p = 0.011$ ). The levels of two amino acids (Asp and Ala) in unmated queens were  
135 significantly lower than in mated queens (Fig. 3B; Asp:  $t = 4.014$ ,  $df = 2$ ,  $p = 0.016$ ;  
136 Ala:  $t = 10.123$ ,  $df = 2$ ,  $p = 0.001$ ), but the levels of six amino acids (Gly, Ile, Leu, Phe,  
137 His and Arg) in unmated queens were significantly higher than in mated queens (Fig.  
138 3B; Gly:  $t = -5.354$ ,  $df = 2$ ,  $p = 0.006$ ; Ile:  $t = -15.296$ ,  $df = 2$ ,  $p < 0.001$ ; Leu:  $t =$   
139  $-3.101$ ,  $df = 2$ ,  $p = 0.036$ ; Phe:  $t = -4.177$ ,  $df = 2$ ,  $p = 0.014$ ; His:  $t = -5.494$ ,  $df = 2$ ,  $p =$   
140  $0.005$ ; Arg:  $t = -5.087$ ,  $df = 2$ ,  $p = 0.007$ ).

## 141 **Trace elements**

142 The Ca level in unfertilized eggs from FF colonies was significantly higher than in  
143 fertilized eggs from FM colonies (Fig. 4A;  $t = -4.923$ ,  $df = 2$ ,  $p = 0.039$ ), but the levels  
144 of five trace elements (Na, K, Zn, Fe and Mn) in unfertilized eggs were significantly  
145 lower than in fertilized eggs (Fig. 4A; Na:  $t = 26.179$ ,  $df = 2$ ,  $p = 0.001$ ; K:  $t = 7.703$ ,  
146  $df = 2$ ,  $p = 0.016$ ; Zn:  $t = 4.436$ ,  $df = 2$ ,  $p = 0.047$ ; Fe:  $t = 5.079$ ,  $df = 2$ ,  $p = 0.037$ ; Mn:  
147  $t = 5.038$ ,  $df = 2$ ,  $p = 0.037$ ). The levels of four trace elements (Zn, Fe, K and Na) in  
148 unmated queens were significantly or marginally significantly higher than in mated  
149 queens (Fig. 4B; Zn:  $t = 4.080$ ,  $df = 2$ ,  $p = 0.015$ ; Fe:  $t = 3.075$ ,  $df = 2$ ,  $p = 0.037$ ; K:  $t$   
150  $= 3.203$ ,  $df = 2$ ,  $p = 0.033$ ; Na:  $t = 2.163$ ,  $df = 2$ ,  $p = 0.097$ ). However, the Mn level in  
151 unmated queens was significantly lower than in mated queens (Fig. 4B;  $t = -3.878$ ,  $df$   
152  $= 2$ ,  $p = 0.018$ ).

## 153 **Nutrient content**

154 The levels of proteins and cholesterol in unfertilized eggs from FF colonies were  
155 significantly higher than in fertilized eggs from FM colonies (Fig. 5A, protein:  $t =$   
156  $4.038$ ,  $df = 4$ ,  $p = 0.016$ ; Fig. 5B, cholesterol:  $t = 3.500$ ,  $df = 4$ ,  $p = 0.025$ ), but the  
157 glucose level of unfertilized eggs was significantly lower than in fertilized eggs (Fig.  
158 5C;  $t = -6.124$ ,  $df = 4$ ,  $p = 0.004$ ). There were no significant differences in the  
159 triglyceride level between unfertilized and fertilized eggs, but the triglyceride level of  
160 unmated queens was significantly lower than in mated queens (Fig. 5D;  $t = -2.906$ ,  $df$

161 = 4,  $p = 0.044$ ).

## 162 **Hormones and neurotransmitters**

163 Levels of the neurotransmitter serotonin in unmated queens from FF colonies were  
164 significantly lower than in mated queens from FM colonies (Fig. 6;  $t = -5.867$ ,  $df = 4$ ,  
165  $p = 0.004$ ), but there were no significant differences in the levels of two hormones (JH  
166 III and ecdysone) or other two neurotransmitters (octopamine and dopamine) between  
167 unmated and mated queens (Fig. 6).

## 168 **Reproductive genes**

169 The expression of three reproductive genes in unfertilized eggs from FF colonies was  
170 significantly higher than in fertilized eggs from FM colonies (Fig. 7A; *vrg 1*:  $t = 6.319$ ,  
171  $df = 2$ ,  $p = 0.024$ ; *rab 11*:  $t = 17.528$ ,  $df = 2$ ,  $p = 0.003$ ; *JHE 1*:  $t = 15.400$ ,  $df = 2$ ,  $p =$   
172  $0.004$ ). Moreover, the expression levels of two reproductive genes in unmated queens  
173 were significantly higher than in mated queens (Fig. 7B; *rab 11*:  $t = 6.614$ ,  $df = 2$ ,  $p =$   
174  $0.022$ ; *JHE 1*:  $t = 4.510$ ,  $df = 2$ ,  $p = 0.046$ ).

## 175 **DISCUSSION**

176 In this study, none of the unfertilized eggs produced by unmated queens from colonies  
177 of *R. chinensis* hatched under laboratory or simulated field conditions, suggesting that  
178 parthenogenesis does not occur in *R. chinensis*, which is consistent with inferences  
179 from the presence of heterozygote genotypes in neotenic reproductives of *R. chinensis*  
180 (Huang et al., 2013) and the lack of a female-biased sex ratio in the flying alates of *R.*  
181 *chinensis* (Li et al., 2015). Our results indicated that the embryos of all unfertilized  
182 eggs ceased growth prior to stage V, potentially due to a lack or reduction of certain  
183 important physiological substances. In addition, almost all of the unfertilized eggs  
184 (14/15) lacked micropyles but all of the fertilized eggs had micropyles in *R. chinensis*;  
185 parthenogenetic eggs of *R. speratus* also lack micropyles (Yashiro and Matsuura,  
186 2014).

187 Amino acids play an important role in ovarian and embryonic development in  
188 animals (Osako et al., 2007; Sato et al., 2009). We found that the levels of five amino  
189 acids (Ile, Leu, Cys, Met and Tyr) in unfertilized eggs were significantly higher than  
190 in fertilized eggs. A possible explanation for this result is that the sustained embryonic  
191 growth of fertilized eggs requires considerable quantities of these five amino acids to

complete incubation. These data are consistent with observations in mice that embryonic growth requires substantial levels of Cys (De Matos et al., 2003). Mated queens had significantly lower levels of six amino acids (Gly, Ile, Leu, Phe, His and Arg), suggesting that mated queens must consume large quantities of these amino acids to complete ovarian development after mating in *R. chinensis*. Compared with unmated queens, the significantly higher levels of two amino acids (Asp and Ala) in mated queens may be derived from male reproductives via mating or trophallaxis.

Several ions, including Ca, K, Na, Cu and Zn, are important for growth, ovarian development, fecundity, and embryonic growth in insects (Judd et al., 2010; McFarlane, 1991). The levels of four trace elements (Na, K, Zn and Fe) in fertilized eggs were significantly higher than in unfertilized eggs, but their levels in mated queens were significantly lower than in unmated queens. A possible explanation for this phenomenon is that mated queens transfer their Na, K, Zn and Fe to fertilized eggs. These four trace elements may be necessary during embryonic growth and incubation. These data are consistent with a previous study that found that a decrease in Zn and/or Fe levels resulted in the cessation of growth in human embryos (Bai et al., 2014). The significantly higher levels of Mn in fertilized eggs and mated queens indicated that Mn plays an important role in ovarian and embryonic development during sexual reproduction. These data are consistent with the observation that a lack of Mn decreases the hatchability of eggs in chickens (Leach and Gross, 1983). In addition, the Ca level in fertilized eggs was significantly lower than in unfertilized eggs, suggesting that fertilized eggs require substantial levels of Ca to sustain embryonic growth during incubation. Similarly, normal embryonic development of eggs in turtles, crocodiles and birds consumes considerable quantities of Ca and obtains a portion of the Ca from the eggshell (Dunn and Boone, 1977).

Macronutrients (protein, glycogen, and lipid) play a crucial role in embryonic growth (Diss et al., 1996; Sloggett and Lorenz, 2008) in insects. In the present study, the levels of proteins and cholesterol in fertilized eggs were significantly lower than in unfertilized eggs, suggesting that the sustained embryonic growth and incubation of fertilized eggs requires more protein and cholesterol than in unfertilized eggs (Diss et al., 1996; Moran, 2007). However, the glucose level in fertilized eggs was significantly higher than in unfertilized eggs, implying that glucose may be a primary energy source in the late stages of embryonic growth (Ding et al., 2008). Mated



queens had significantly higher levels of triglycerides than unmated queens, suggesting that triglycerides are an important energy source during ovarian development after mating in *R. chinensis*. This result is consistent with the rapid increase in triglycerides observed during ovarian development in the mated female adults of *Marsupenaeus japonicus* (Cavalli et al., 2001). A portion of the triglycerides in mated queens may be derived from males via mating or trophallaxis (Matsuura and Nishida, 2001; Shellman-Reeve, 1990).

Little is known about which genes are involved in the regulation of ovarian and embryonic growth in termites (Ishitani and Maekawa, 2010; Maekawa et al., 2010). In the present study, we found that the expression levels of two reproductive genes (*rab 11* and *JHE 1*) in unfertilized eggs and unmated queens were significantly higher than in fertilized eggs and mated queens. A previous study demonstrated that *Rab 11* is a small GTP binding protein involved in vesicular trafficking and plays a crucial role in the fertility of *Drosophila* (Tiwari et al., 2008). Juvenile hormone esterase (JHE), a member of the carboxylesterase family, contributes to the rapid decline in JH in most of insects. JH is well known to play an important role in the reproductive competence and caste polyphenism of termites (Cornette et al., 2008; Elliott and Stay, 2008; Zhou et al., 2007). Thus, we predicted that these two reproductive genes (*rab 11* and *JHE 1*) might play a role in the ovarian and embryonic development of *R. chinensis*. In this study, we did not find significant differences in two other hormones (JH III and ecdysone) between mated queens and unmated queens, but the serotonin level of mated queens was significantly higher than in unmated queens. As a neurotransmitter, serotonin is correlated with reproductive behaviour in mice (Liu et al., 2011; Zhang et al., 2013), suggesting that it might also play an important role in the sexual reproduction of *R. chinensis*. Vitellogenin is the dominant egg yolk protein in insects (Sappington and Raikhel, 1998). The expression of the gene *vgt 1* in fertilized eggs was significantly lower than in unfertilized eggs in this study, suggesting that fertilized eggs require more vitellogenin to complete embryonic development and incubation.

In conclusion, unfertilized eggs can be produced by unmated queens of *R. chinensis* but do not hatch under laboratory and simulated field conditions, suggesting that *R. chinensis* exhibits neither AQS nor parthenogenesis. Through physiological analyses, we found that unfertilized eggs ceased embryonic growth and had significant

258 differences in morphological characters, size and micropyle number compared with  
 259 fertilized eggs in the final stage of development. Moreover, fertilized eggs consumed  
 260 significantly larger quantities of five amino acids (Cys, Met, Ile, Leu and Tyr), Ca,  
 261 protein, and cholesterol during embryonic growth and incubation. Fertilized eggs may  
 262 obtain a portion of four trace elements (Na, K, Zn and Fe) from mated queens, which  
 263 facilitate embryonic growth during incubation. The significantly higher levels of Mn  
 264 and glucose in fertilized eggs than unfertilized eggs suggest that these substances play  
 265 an important role in the completion of embryonic growth and incubation. The  
 266 significantly higher levels of triglycerides and serotonin in mated queens than in  
 267 unmated queens imply that they are very important for ovarian development during  
 268 sexual reproduction. The greater expression of three genes (*vtg1*, *rab11* and *JHE1*) in  
 269 unfertilized eggs and two genes (*rab11* and *JHE1*) in unmated queens suggests that  
 270 these reproductive genes may be involved in the regulation of ovarian and embryonic  
 271 growth in *R. chinensis*. Overall, the differences in these physiological indices may  
 272 substantially affect ovarian and embryonic growth and prohibit the incubation of  
 273 unfertilized eggs in *R. chinensis*. Our physiological findings contribute to an  
 274 understanding of why the subterranean termite *R. chinensis* exhibits neither AQS nor  
 275 parthenogenesis even though it is a close relative of *R. speratus*, which exhibits AQS.

## 276 MATERIALS AND METHODS

### 277 Formation of female-female colonies and female-male colonies under laboratory 278 conditions

279 The alates of *R. chinensis* used in this study were collected together with nest wood  
 280 just prior to the swarming season. In April 2013, four mature colonies were collected  
 281 from Nanwang Hill (A), Yujia Hill (B), and Shizi Hill (C and D), in Wuhan City,  
 282 China. The termites were reared in an open plastic container (670×480×410 mm<sup>3</sup>)  
 283 covered by nylon mesh in a dark room with a temperature of 25°C for 14 days and  
 284 then moved to a room with a temperature of 30°C to help the alates fly (Matsuura et  
 285 al., 2002; Matsuura and Nishida, 2001). Details of the methods for founder  
 286 combinations and brood observation are described in Text S1.

### 287 Formation of female-female colonies and female-male colonies under simulated 288 field conditions

289 In April 2012, three mature colonies were collected from Nanwang Hill (E), Yujia Hill

(F), and Shizi Hill (G), in Wuhan City, China. We used the same method as described above for the laboratory conditions to help alates fly. Details of the methods for founder combinations and brood observation are described in Text S1.

### **Morphological observation of eggs at the five developmental stages**

We used the same colonies and method as described above for the laboratory conditions to build founder combinations. Details of the methods for egg culture and observation of embryonic growth, egg sizes and micropyle number are described in Text S1.

### **Amino acids**

Unmated queens and unfertilized eggs from FF colonies and mated queens and fertilized eggs from FM colonies were sampled for the analysis of amino acid composition using an automatic amino acid analyser. Details of the methods for quantifying amino acids are described in Text S1.

### **Trace elements**

Unmated queens and unfertilized eggs from FF colonies and mated queens and fertilized eggs from FM colonies were sampled for the analysis of levels of eight trace elements—Ca, Cu, Fe, K, Mg, Mn, Na, and Zn—using ICP-OES (Judd et al., 2010). Details of the methods for the assays of trace elements are described in Text S1.

### **Nutrient content**

Unmated queens and unfertilized eggs from FF colonies and mated queens and fertilized eggs from FM colonies were sampled for the analysis of levels of four nutrients—protein, cholesterol, glucose and triglycerides—using a microplate spectrophotometer (Li et al., 2015). Details of the methods for nutrient content analysis are described in Text S1.

### **Hormones and neurotransmitters**

Unmated queens from FF colonies and mated queens from FM colonies were sampled to determine the levels of hormones (JH III and ecdysone) and neurotransmitters (serotonin, octopamine and dopamine) in unmated and mated queens using multiple reaction monitoring (MRM) analysis. Details of the MRM analysis are described in Text S1.

## 320 **Reproductive genes**

321 Unmated queens and unfertilized eggs from FF colonies and mated queens and  
 322 fertilized eggs from FM colonies were sampled to assess the expression of three  
 323 reproductive genes—*Vitellogenin 1* (*vlg 1*), *rab 11* and juvenile hormone esterase-like  
 324 protein Est1 (*JHE 1*)—using qPCR. Details of the methods for RNA extraction,  
 325 primer design, PCR application and qPCR are described in Text S1.

326 **Acknowledgements**

327 We thank Fei Chu, Wei Wang, Huan Xu and Yongyong Gao for their assistance with field  
328 collections. We thank the anonymous reviewers for providing valuable comments on earlier drafts  
329 of this manuscript.

330 **Competing interests**

331 The authors declare no competing or financial interests.

332 **Author contributions**

333 G.H.L., C.L.L. and Q.Y.H. conceived and designed the experiments; G.H.L., L.L., P.D.S. and  
334 Q.Y.H. performed the experiments; G.H.L., L.L. and Q.Y.H. analysed the data; G.H.L., L.L., P.D.S.,  
335 Y.W., X.W.C and Q.Y.H. wrote the paper. All authors read and approved the final manuscript.

336 **Funding**

337 This research was funded by the National Natural Science Foundation of China (31572322 and  
338 31000978) and the Fundamental Research Funds for the Central Universities (2013PY007).

## References

- Austin, J. W., Szalanski, A. L., Cabrera, B. J.** (2004). Phylogenetic analysis of the subterranean termite family Rhinotermitidae (Isoptera) by using the mitochondrial cytochrome oxidase II gene. *Ann. Entomol. Soc. Am.* **97**, 548-555.
- Bai, F. L., Gao, Y., Li, Q. X., Zhao, Y., Xu, H., Liu, R. X.** (2014). Study on relationship between syndrome type of embryonic development stops and the level of trace elements. *Chinese Journal of Basic Medicine in Traditional Chinese Medicine* **20**, 1230-1232.
- Bodnaryk, R., Morrison, P.** (1966). The relationship between nutrition, haemolymph proteins, and ovarian development in *Musca domestica* L. *J. Insect Physiol.* **12**, 963-976.
- Cavalli, R. O., Tamtin, M., Lavens, P., Sorgeloos, P.** (2001). Variations in lipid classes and fatty acid content in tissues of wild *Macrobrachium rosenbergii* (de Man) females during maturation. *Aquaculture* **193**, 311-324.
- Chaudhury, M., Alvarez, L. A., Velazquez, L. L.** (2000). A new meatless diet for adult screwworm (Diptera: Calliphoridae). *J. Econ. Entomol.* **93**, 1398-1401.
- Cornette, R., Gotoh, H., Koshikawa, S., Miura, T.** (2008). Juvenile hormone titers and caste differentiation in the damp-wood termite *Hodotermopsis sjostedti* (Isoptera, Termopsidae). *J. Insect Physiol.* **54**, 922-930.
- De Matos, D., Nogueira, D., Cortvrindt, R., Herrera, C., Adriaenssens, T., Pasqualini, R., Smits, J.** (2003). Capacity of adult and prepubertal mouse oocytes to undergo embryo development in the presence of cysteamine. *Mol. Reprod. Dev.* **64**, 214-218.
- Ding, F., Zhou, H. L., Liu, Y., Ma, L., Su, Y., Du, L.** (2008). Effects of glucose on development of ICR mouse embryos in vitro. *Zoological Reserach* **28**, 501-506.
- Diss, A., Kunkel, J., Montgomery, M., Leonard, D.** (1996). Effects of maternal nutrition and egg provisioning on parameters of larval hatch, survival and dispersal in the gypsy moth, *Lymantria dispar* L. *Oecologia* **106**, 470-477.
- Dunn, B., Boone, D. M.** (1977). Growth and mineral content of cultured chick embryos. *Poultry Sci.* **56**, 662-672.
- Elliott, K. L., Stay, B.** (2008). Changes in juvenile hormone synthesis in the termite *Reticulitermes flavipes* during development of soldiers and neotenic reproductives from groups of isolated workers. *J.*

368 *Insect Physiol.* **54**, 492-500.

369 **Fougeyrollas, R., Dolejšová, K., Sillam-Dussès, D., Roy, V., Poteaux, C., Hanus, R., Roisin, Y.**

370 (2015). Asexual queen succession in the higher termite *Embiratermes neotenicus*. *Proc. R. Soc. Lond.,*

371 *Ser. B: Biol. Sci.* **282**, 20150260.

372 **Hagedorn, H., O'connor, J., Fuchs, M. S., Sage, B., Schlaeger, D. A., Bohm, M.** (1975). The ovary

373 as a source of alpha-ecdysone in an adult mosquito. *Proc. Natl. Acad. Sci. USA* **72**, 3255-3259.

374 **Hammack, L.** (1999). Stimulation of oogenesis by proteinaceous adult diets for screwworm,

375 *Cochliomyia hominivorax* (Diptera: Calliphoridae). *Bull. Entomol. Res.* **89**, 433-440.

376 **Huang, Q. Y., Li, G. H., Husseneder, C., Lei, C. L.** (2013). Genetic analysis of population structure

377 and reproductive mode of the termite *Reticulitermes chinensis* snyder. *PloS one* **8**, e69070.

378 **Ishitani, K., Maekawa, K.** (2010). Ovarian development of female-female pairs in the termite,

379 *Reticulitermes speratus*. *J. Insect Sci.* **10**, 94.

380 **Judd, T. M., Magnus, R. M., Fasnacht, M. P.** (2010). A nutritional profile of the social wasp *Polistes*

381 *metricus*: Differences in nutrient levels between castes and changes within castes during the annual life

382 cycle. *J. Insect Physiol.* **56**, 42-56.

383 **Kawatsu, K., Matsuura, K.** (2013). Preadaptation for parthenogenetic colony foundation in

384 subterranean termites *Reticulitermes* spp.(Isoptera: Rhinotermitidae). *J. Ethol.* **31**, 123-128.

385 **Lagueux, M., Hirn, M., Hoffmann, J. A.** (1977). Ecdysone during ovarian development in *Locusta*

386 *migratoria*. *J. Insect Physiol.* **23**, 109-119.

387 **Leach, R., Gross, J.** (1983). The effect of manganese deficiency upon the ultrastructure of the eggshell.

388 *Poultry Sci.* **62**, 499-504.

389 **Li, G. H., Lei, C. L., Wang, Z. H., Huang, Q. Y.** (2015). Dynamics of sex ratio, fresh weight and

390 nutrient contents at five developmental stages of alates in the subterranean termite *Reticulitermes*

391 *chinensis*. *Insectes Sociaux* **62**, 51-57.

392 **Liu, L., Li, G. H., Sun, P. D., Lei, C. L., Huang, Q. Y.** (2015). Experimental verification and

393 molecular basis of active immunization against fungal pathogens in termites. *Sci. Rep.* **5**, 15106.

394 **Liu, Y., Si, Y. X., Kim, J.-Y., Chen, Z.-F., Rao, Y.** (2011). Molecular regulation of sexual preference

395 revealed by genetic studies of 5-HT in the brains of male mice. *Nature* **472**, 95-99.

396 **Luchetti, A., Velonà, A., Mueller, M., Mantovani, B.** (2013). Breeding systems and reproductive

397 strategies in Italian *Reticulitermes* colonies (Isoptera: Rhinotermitidae). *Insectes Soc.* **60**, 203-211.

398 **Maekawa, K., Ishitani, K., Gotoh, H., Cornette, R., Miura, T.** (2010). Juvenile Hormone titre and  
399 vitellogenin gene expression related to ovarian development in primary reproductives compared with  
400 nymphs and nymphoid reproductives of the termite *Reticulitermes speratus*. *Physiol. Entomol.* **35**,  
401 52-58.

402 **Matsuura, K.** (2011). Sexual and asexual reproduction in termites, In *Biology of termites: a modern*  
403 *synthesis*(eds. D. E. Bignell, Y. Roisin and N. Lo), pp. 255-277. Dordrecht: The Netherlands: Springer.

404 **Matsuura, K., Fujimoto, M., Goka, K., Nishida, T.** (2002). Cooperative colony foundation by termite  
405 female pairs: altruism for survivorship in incipient colonies. *Anim. Behav.* **64**, 167-173.

406 **Matsuura, K., Kobayashi, N.** (2007). Size, hatching rate, and hatching period of sexually and  
407 asexually produced eggs in the facultatively parthenogenetic termite *Reticulitermes speratus* (Isoptera:  
408 Rhinotermitidae). *Appl. Entomol. Zool.* **42**, 241-246.

409 **Matsuura, K., Nishida, T.** (2001). Comparison of colony foundation success between sexual pairs and  
410 female asexual units in the termite *Reticulitermes speratus* (Isoptera : Rhinotermitidae). *Popul. Ecol.* **43**,  
411 119-124.

412 **Matsuura, K., Vargo, E. L., Kawatsu, K., Labadie, P. E., Nakano, H., Yashiro, T., Tsuji, K.** (2009).  
413 Queen succession through asexual reproduction in termites. *Science* **323**, 1687.

414 **McFarlane, J. E.** (1991). Dietary sodium, potassium and calcium requirements of the house cricket,  
415 *Acheta domesticus* (L.). *Comparative biochemistry and physiology. A, Comparative physiology* **100**,  
416 217-220.

417 **Moran, E.** (2007). Nutrition of the developing embryo and hatchling. *Poultry science* **86**, 1043-1049.

418 **Osako, K., Fujii, A., Ruttanapornvareesakul, Y., Nagano, N., Kuwahara, K., Okamoto, A.** (2007).  
419 Differences in free amino acid composition between testis and ovary of sea urchin *Anthocardaris*  
420 *crassispina* during gonadal development. *Fish. Sci.* **73**, 660-667.

421 **Roisin, Y., Hanus, R., Fournier, D.** (2014). Asexual queen succession in soil-feeding termites  
422 (*Cavitermes tuberosus*), 17th Congress of the International Union for the Study of Social Insects  
423 (IUSSI). IUSSI, Cairns, Queensland, Australia.

424 **Sappington, T. W., Raikhel, A. S.** (1998). Molecular characteristics of insect vitellogenins and  
425 vitellogenin receptors. *Insect Biochem. Mol. Biol.* **28**, 277-300.



426 **Sato, M., Tomonaga, S., Denbow, D. M., Furuse, M.** (2009). Changes in free amino acids in the brain  
427 during embryonic development in layer and broiler chickens. *Amino Acids* **36**, 303-308.

428 **Shellman-Reeve, J. S.** (1990). Dynamics of biparental care in the dampwood termite, *Zootermopsis*  
429 *nevadensis* (Hagen): response to nitrogen availability. *Behav. Ecol. Sociobiol.* **26**, 389-397.

430 **Sloggett, J. J., Lorenz, M. W.** (2008). Egg composition and reproductive investment in aphidophagous  
431 ladybird beetles (Coccinellidae: Coccinellini): egg development and interspecific variation.  
432 *Physiological Entomology* **33**, 200-208.

433 **Tiwari, A. K., Alone, D. P., Roy, J. K.** (2008). Rab11 is essential for fertility in *Drosophila*. *Cell Biol.*  
434 *Int.* **32**, 1158-1168.

435 **Vargo, E. L., Labadie, P. E., Matsuura, K.** (2012). Asexual queen succession in the subterranean  
436 termite *Reticulitermes virginicus*. *Proc. R. Soc. Lond., Ser. B: Biol. Sci.* **279**, 813-819.

437 **Yashiro, T., Matsuura, K.** (2014). Termite queens close the sperm gates of eggs to switch from sexual  
438 to asexual reproduction. *Proc. Natl. Acad. Sci. USA* **111**, 17212-17217.

439 **Zhang, S. S., Liu, Y., Rao, Y.** (2013). Serotonin signaling in the brain of adult female mice is required  
440 for sexual preference. *Proc. Natl. Acad. Sci. USA* **110**, 9968-9973.

441 **Zhou, X., Tarver, M., Scharf, M.** (2007). Hexamerin-based regulation of juvenile hormone-dependent  
442 gene expression underlies phenotypic plasticity in a social insect. *Development* **134**, 601-610.

## 443 **Figure Legends**

444 **Fig. 1. Comparison of brood number (mean  $\pm$  S.E.M.) between female-female and**  
 445 **female-male colonies.** (a) Eggs and (b) post-hatch individuals under laboratory conditions; (c)  
 446 post-hatch individuals under simulated field conditions. Asterisks denote significant differences  
 447 (paired *t*-test, n.s. = not significant, \* *p* < 0.05, \*\* *p* < 0.01, \*\*\* *p* < 0.001).

448 **Fig. 2. Differences in morphological characters, size and micropyle number between**  
 449 **unfertilized and fertilized eggs.** (a) Egg morphology under stereoscope. GB: germ band; HL:  
 450 head lobe; HC: head capsule; Se: serosa; Am: amnion; L: leg; (b) egg morphology under SEM; (c)  
 451 differences in egg size between unfertilized and fertilized eggs at five developmental stages under  
 452 SEM; (d) unfertilized eggs without micropyles; and (e) fertilized eggs with micropyles under  
 453 SEM.

454 **Fig. 3. Differences in the levels of 11 amino acids between unfertilized eggs/unmated queens**  
 455 **and fertilized eggs/mated queens.**

456 **Fig. 4. Differences in the levels of eight trace elements between unfertilized eggs/unmated**  
 457 **queens and fertilized eggs/mated queens.**

458 **Fig. 5. Differences in the content of four nutrients between unfertilized eggs/unmated queens**  
 459 **and fertilized eggs/mated queens.**

460 **Fig. 6. Differences in the levels of two hormones and three neurotransmitters between**  
 461 **unmated and mated queens.**

462 **Fig. 7. Differences in the expression of three reproductive genes between unfertilized**  
 463 **eggs/unmated queens and fertilized eggs/mated queens.**

**A**

□ female-female colonies ■ female-male colonies

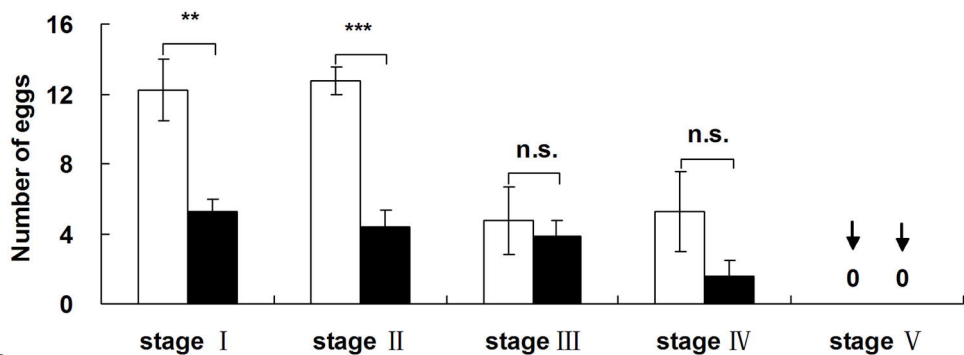**B**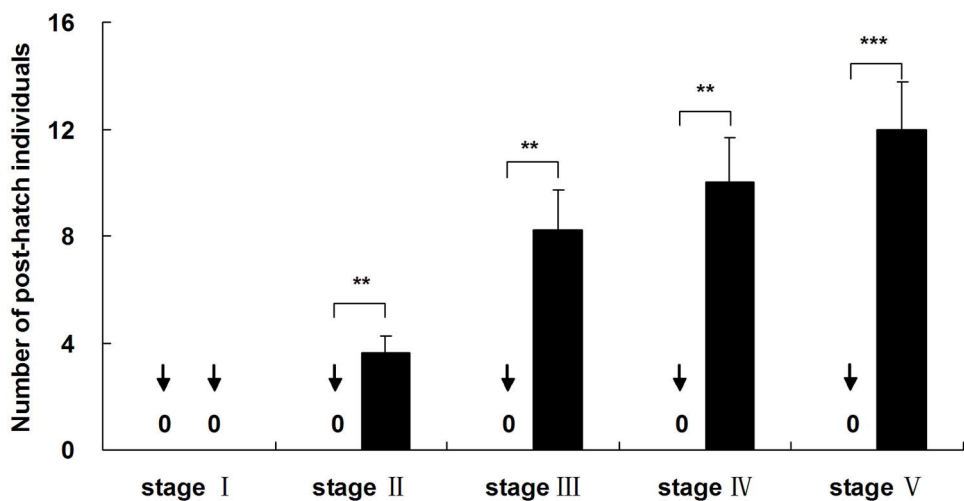**C**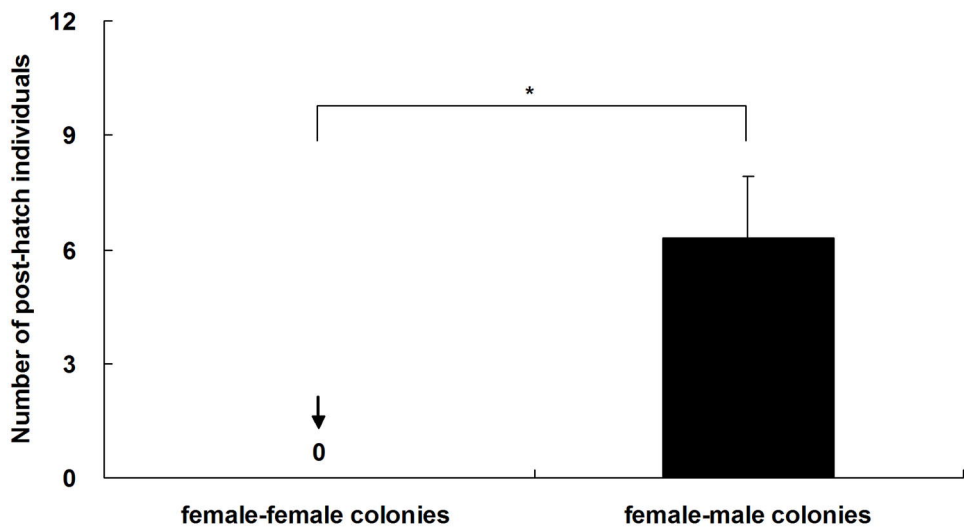

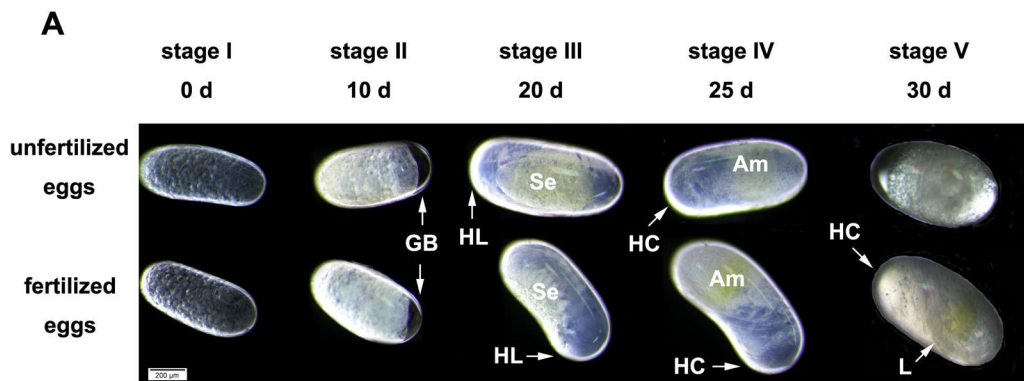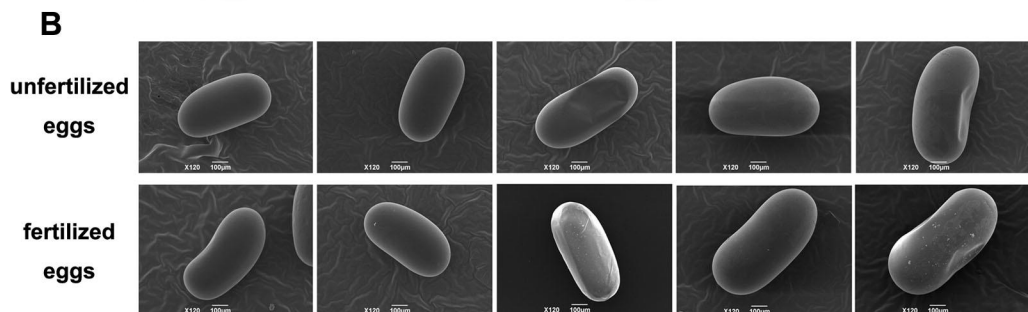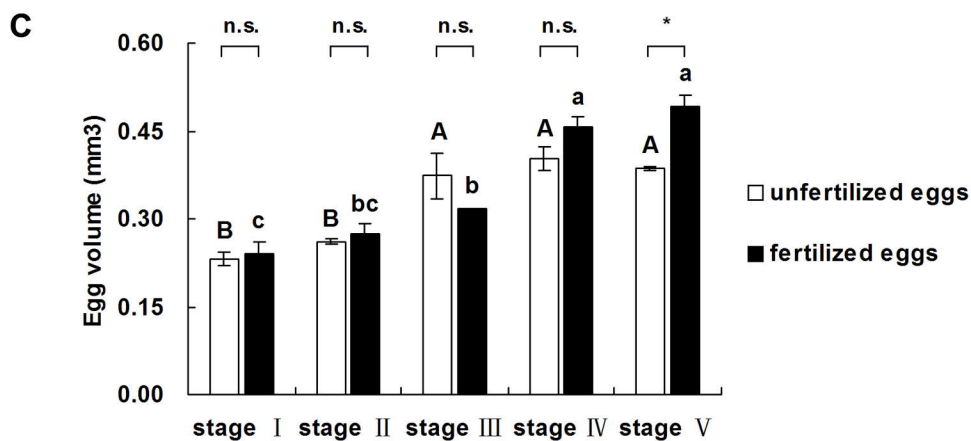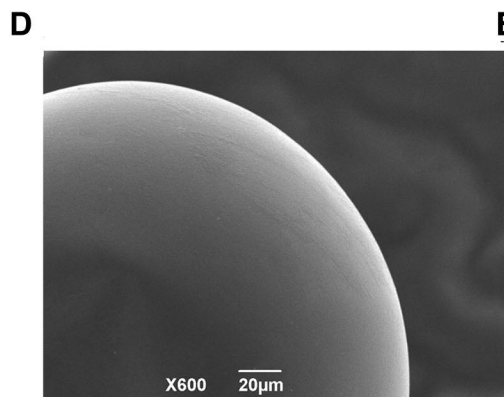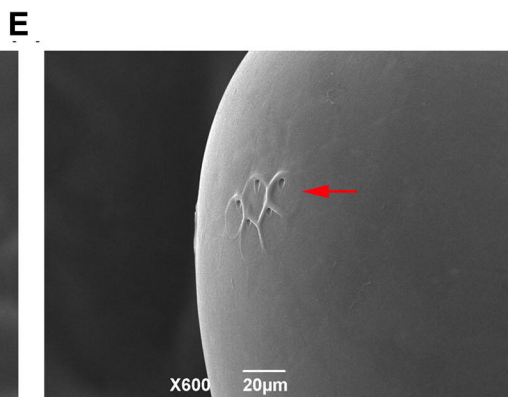

**A**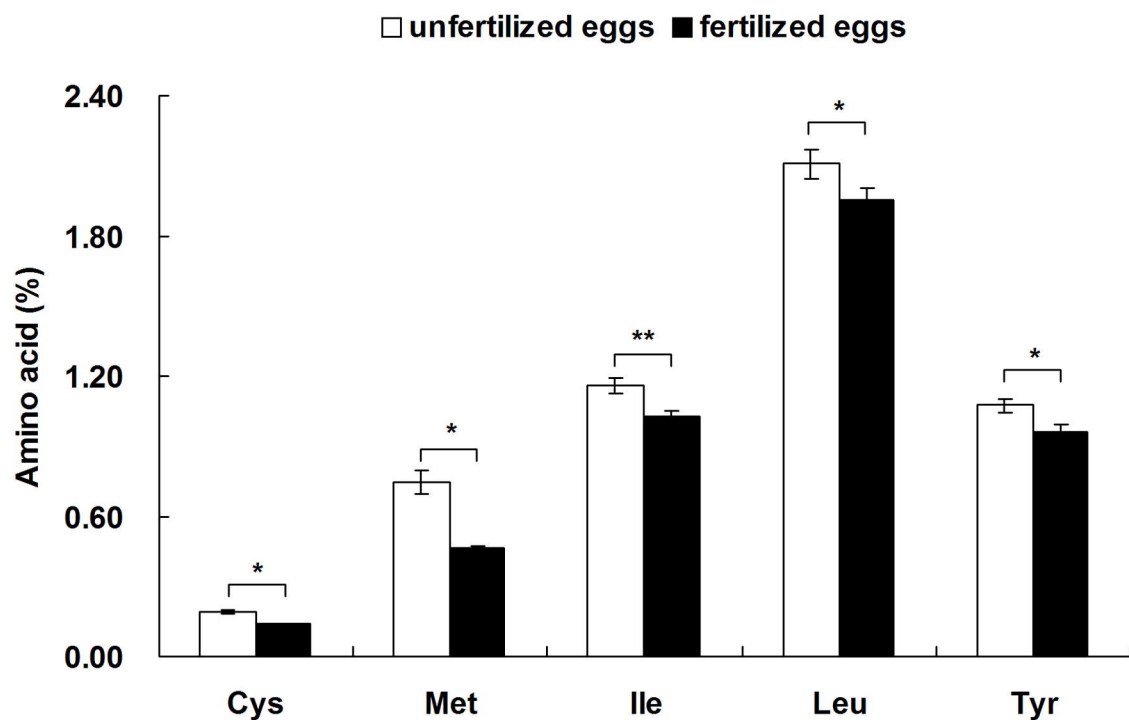**B**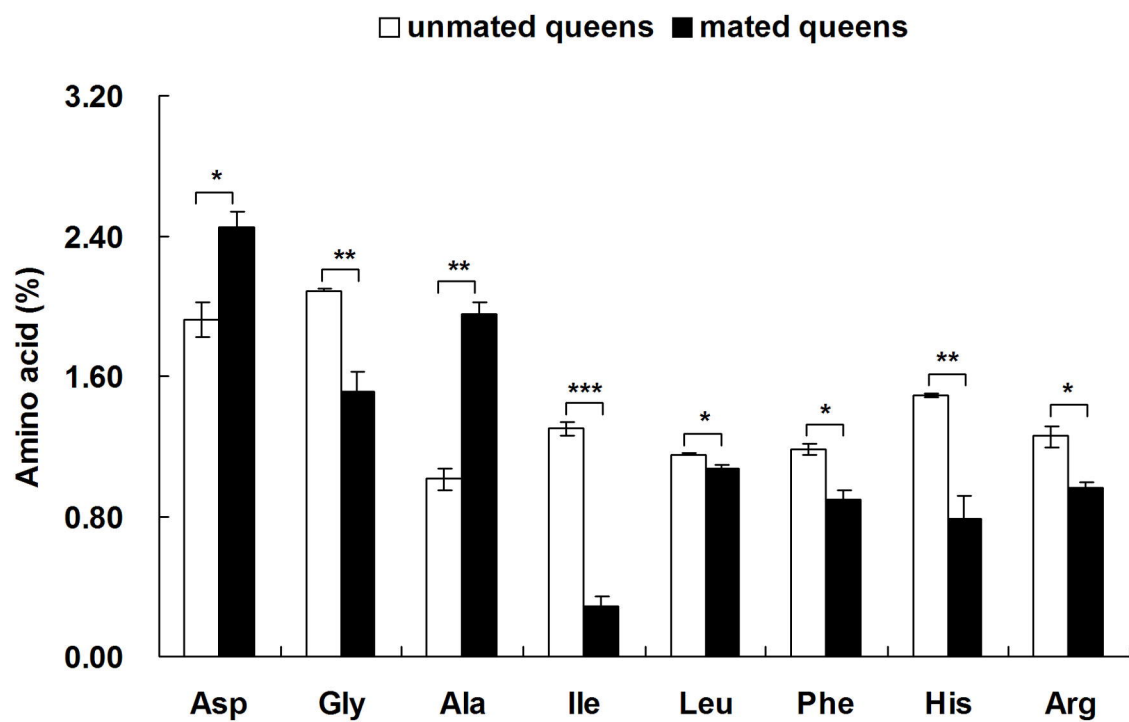

**A**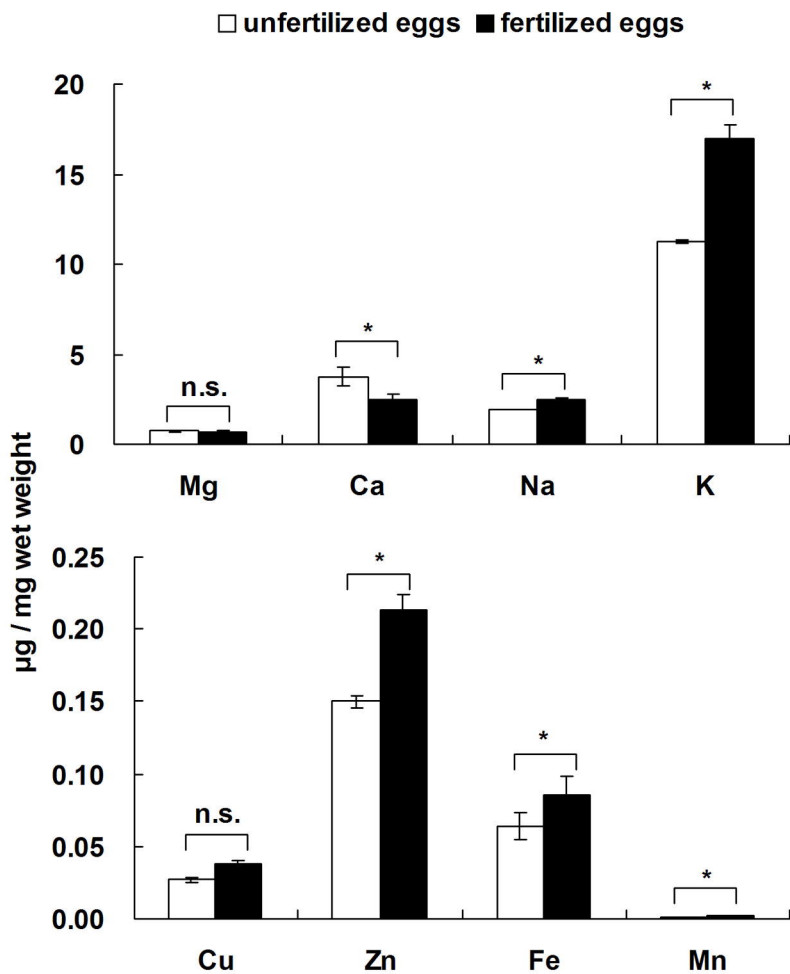**B**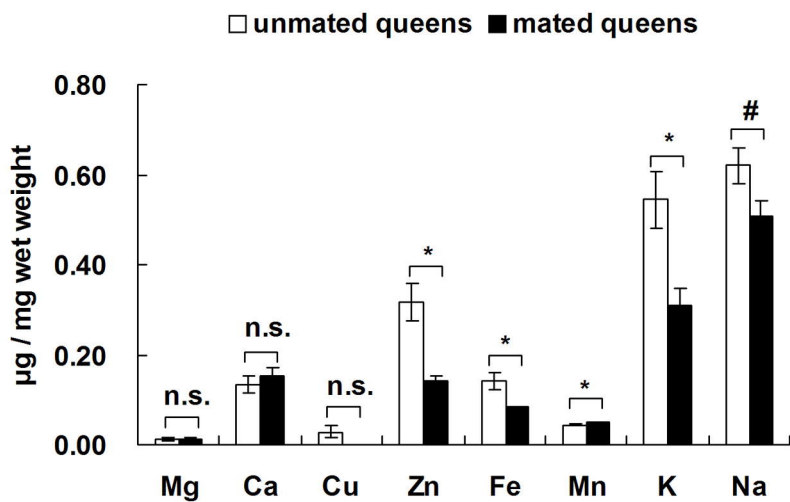

**A**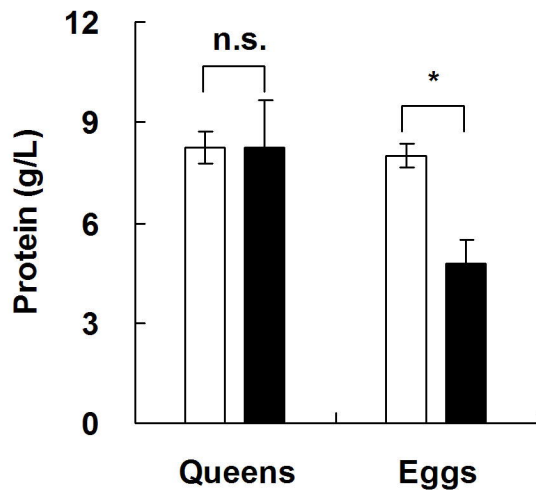**B**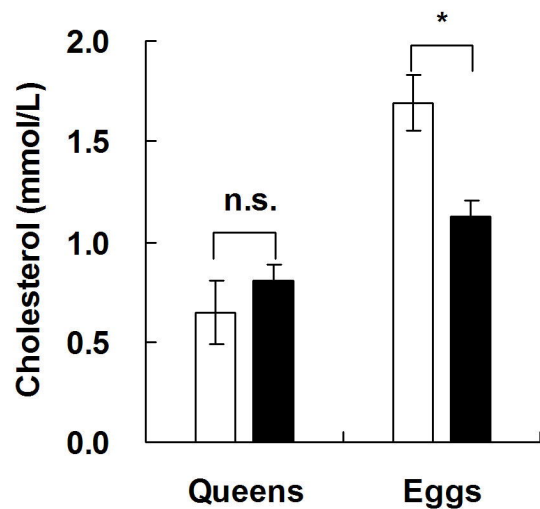**C**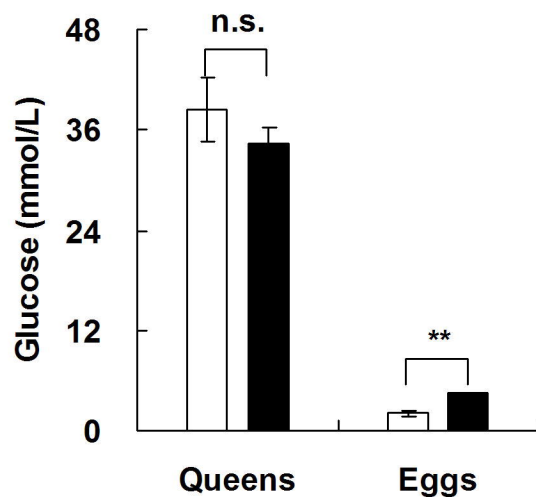**D**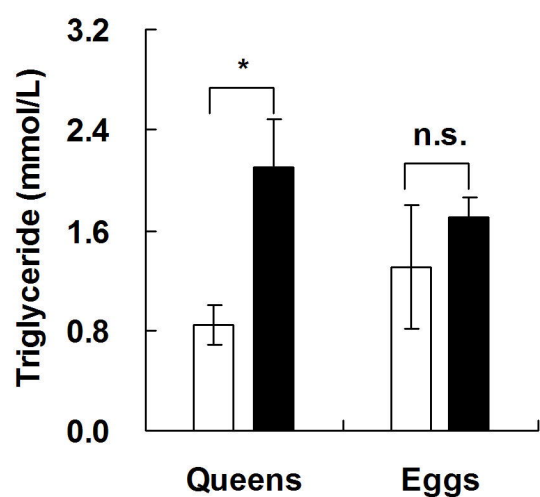

□ female-female colonies ■ female-male colonies

□ unmated queens    ■ mated queens

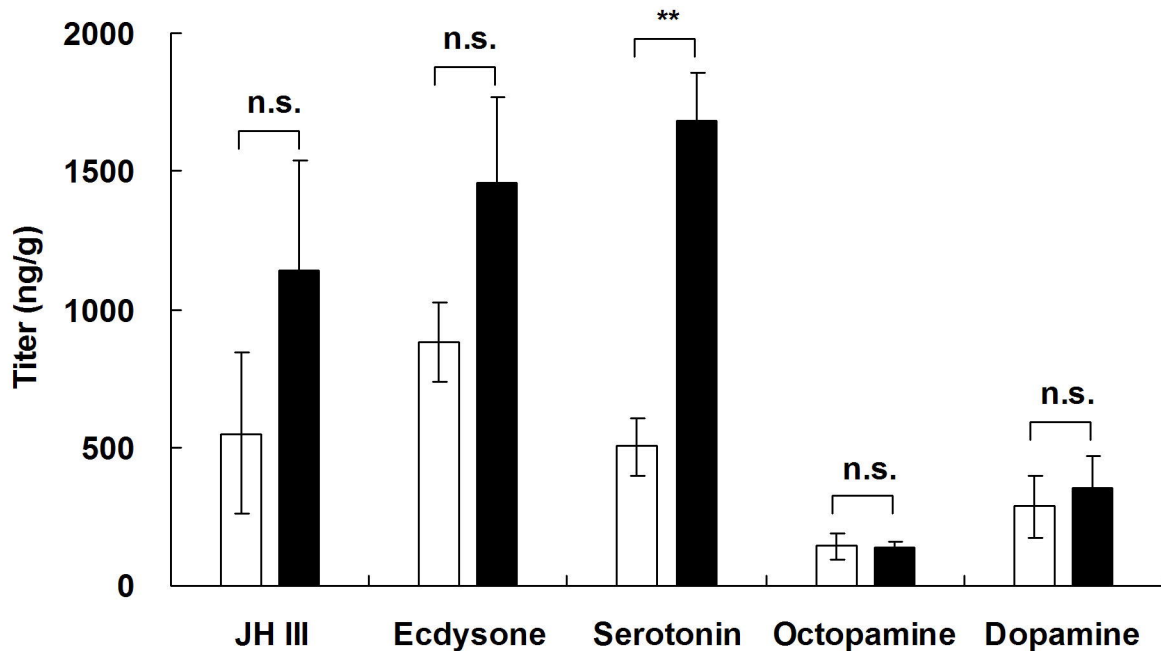



**A**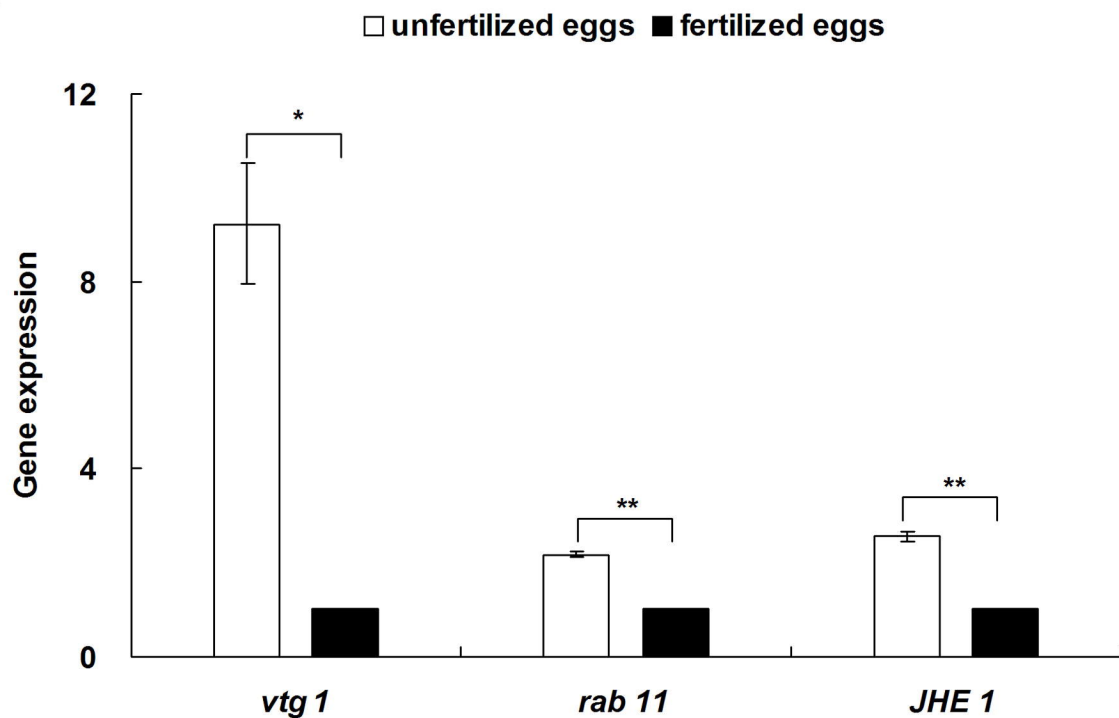**B**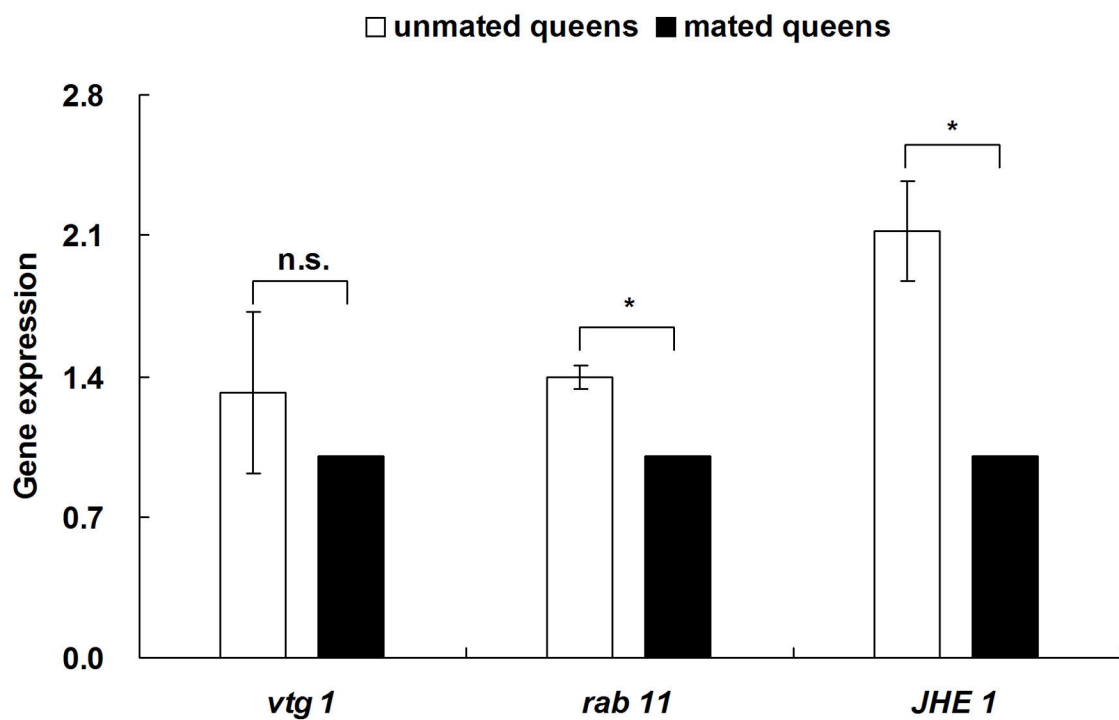

Source: http://biorxiv.org/content/10.1101/037390v1.full.pdf
